# Supplementary material for: Improving the luminescence properties of the near-infrared phosphor Ca0.8Sr0.2O:Eu2+via energy transfer and its application in the concentration detection of ethanol solutions
Source: Royal Society of Chemistry journal article supplement (doi:10.1039/d5ra02418h), 2025-01-01
Supplement: d5ra02418h1.pdf [file d5ra02418h1.pdf]

# Supporting information

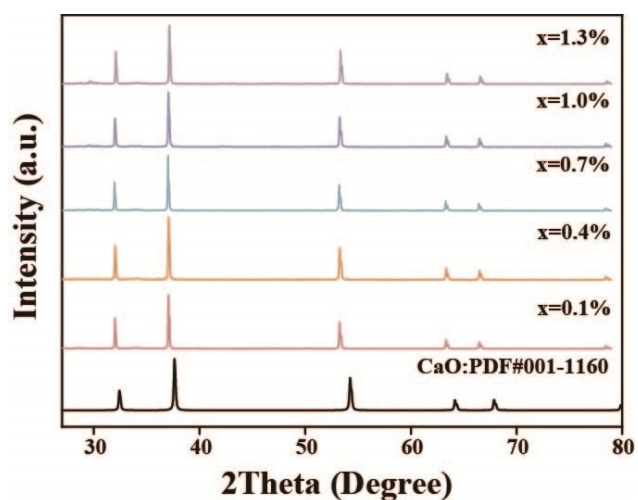

Figure S1 XRD patterns of  $\text{Ca}_{0.8}\text{Sr}_{0.2-x}\text{O}:\text{xCe}^{3+}$  ( $x = 0.1\%-1.3\%$ ).

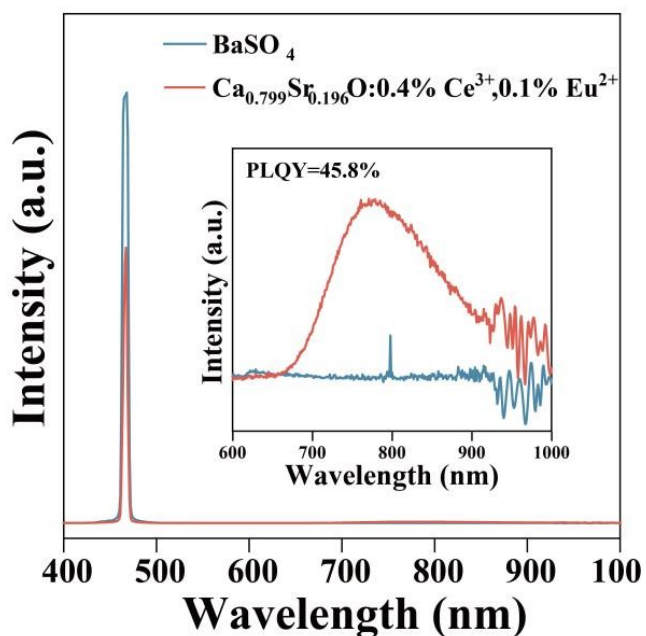

Figure S2 Quantum efficiency of  $\text{Ca}_{0.799}\text{Sr}_{0.196}\text{O}:\text{0.4\%Ce}^{3+}, \text{0.1\%Eu}^{2+}$  (inset: magnification of 600-1000 nm).

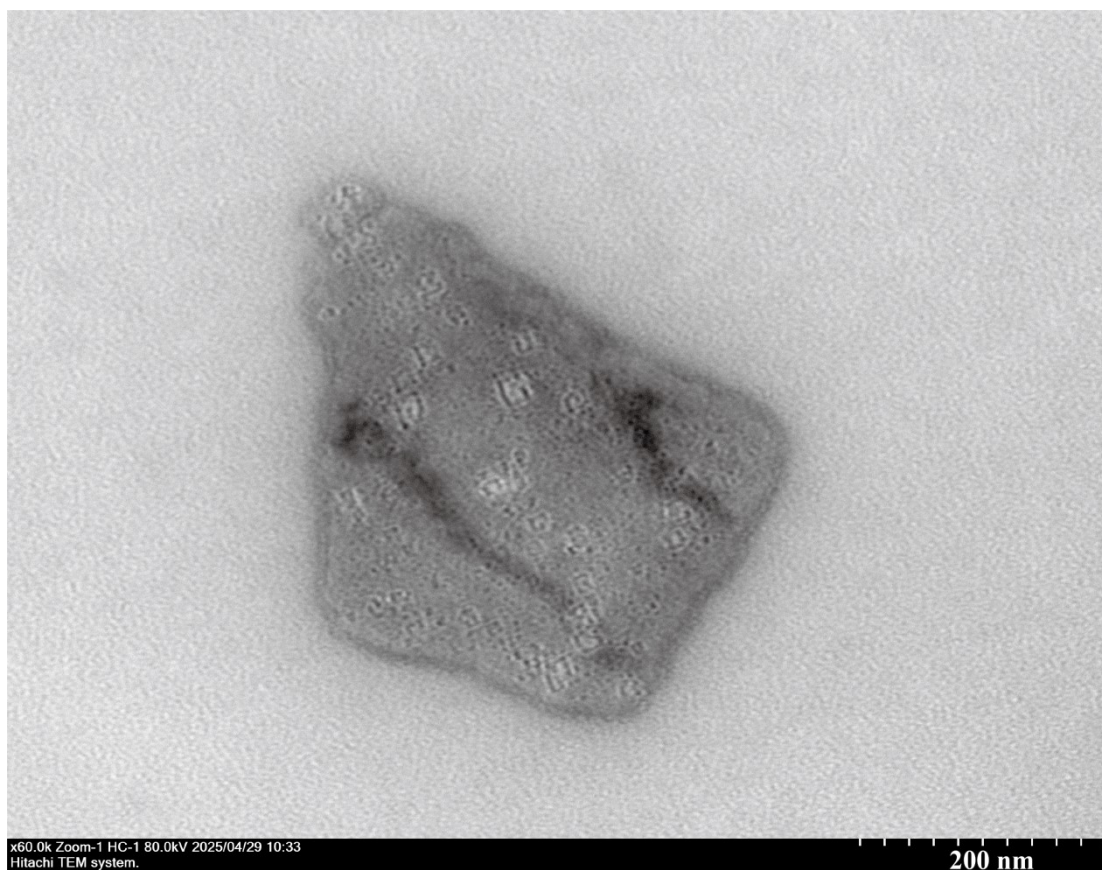

**Figure S3** TEM image of CSO:0.4%Ce<sup>3+</sup>,0.1%Eu<sup>2+</sup>

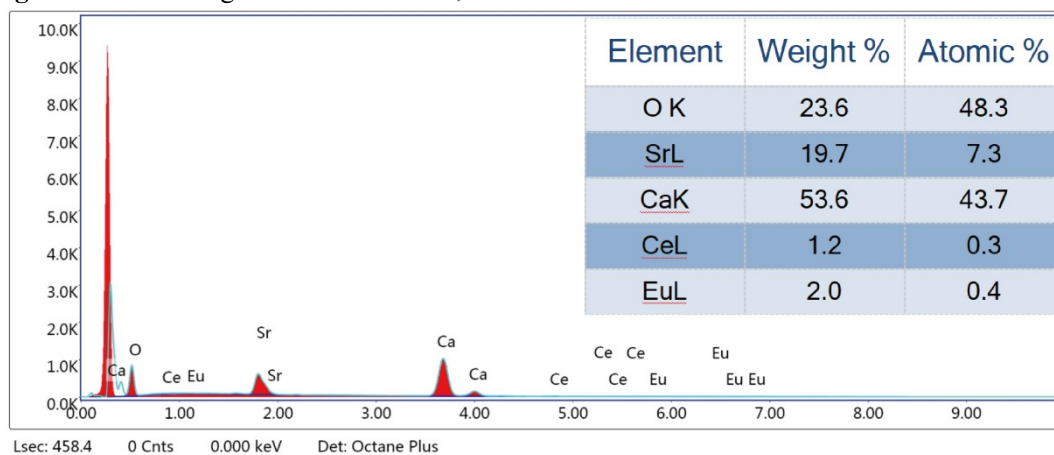

**Figure S4** EDX pattern of CSO:0.4%Ce<sup>3+</sup>,0.1%Eu<sup>2+</sup>.

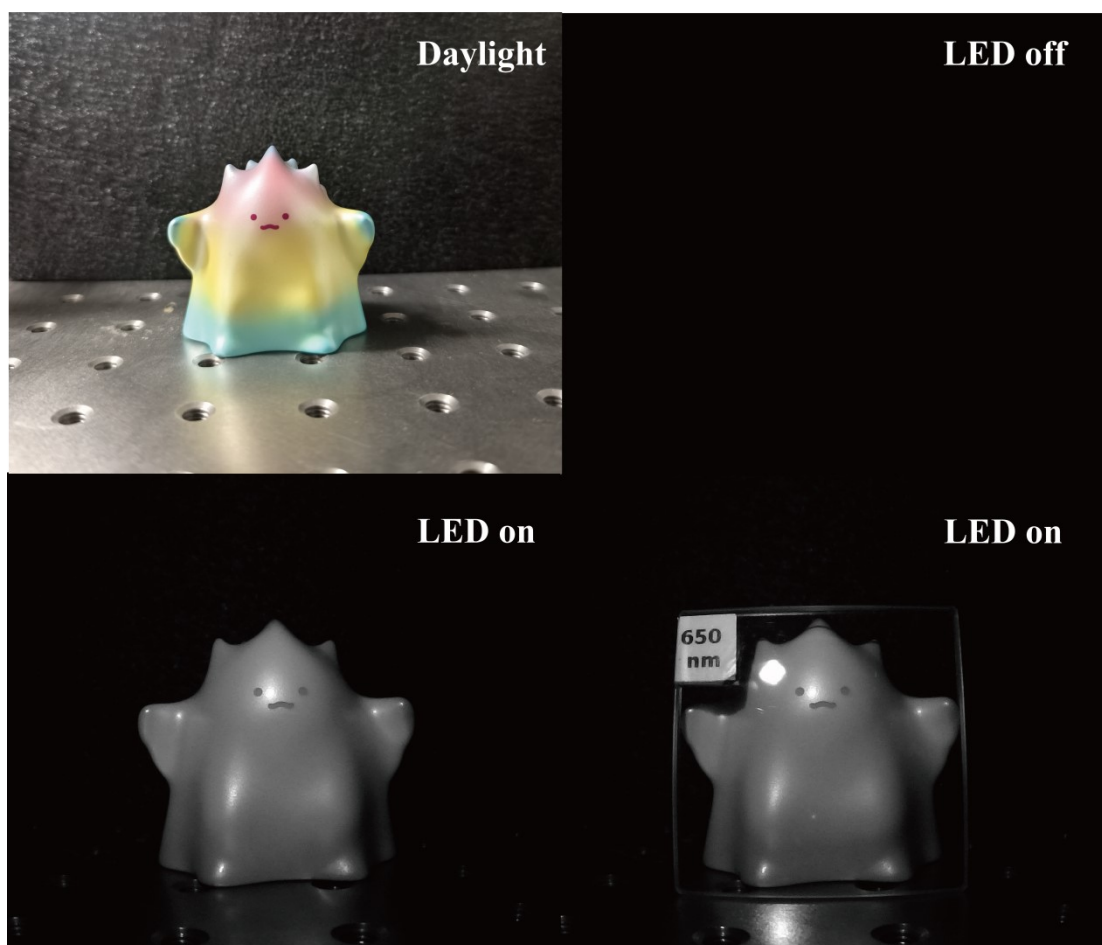

**Figure S5** Synthesized LED as a light source under a near-infrared camera.
